# Supplementary material
Source: HighWire-hosted journal article supplement (http://cmajopen.ca/highwire/filestream/81187/field_highwire_adjunct_files/1/2017-0072-2-at.pdf)
Supplement: 2017-0072-2-at.pdf [file 2017-0072-2-at.pdf]

# Appendix 2 (as supplied by the authors): Household Screening Questionnaire (Telephone Script)

Figure 1. Eligible Household Contacts Worksheet

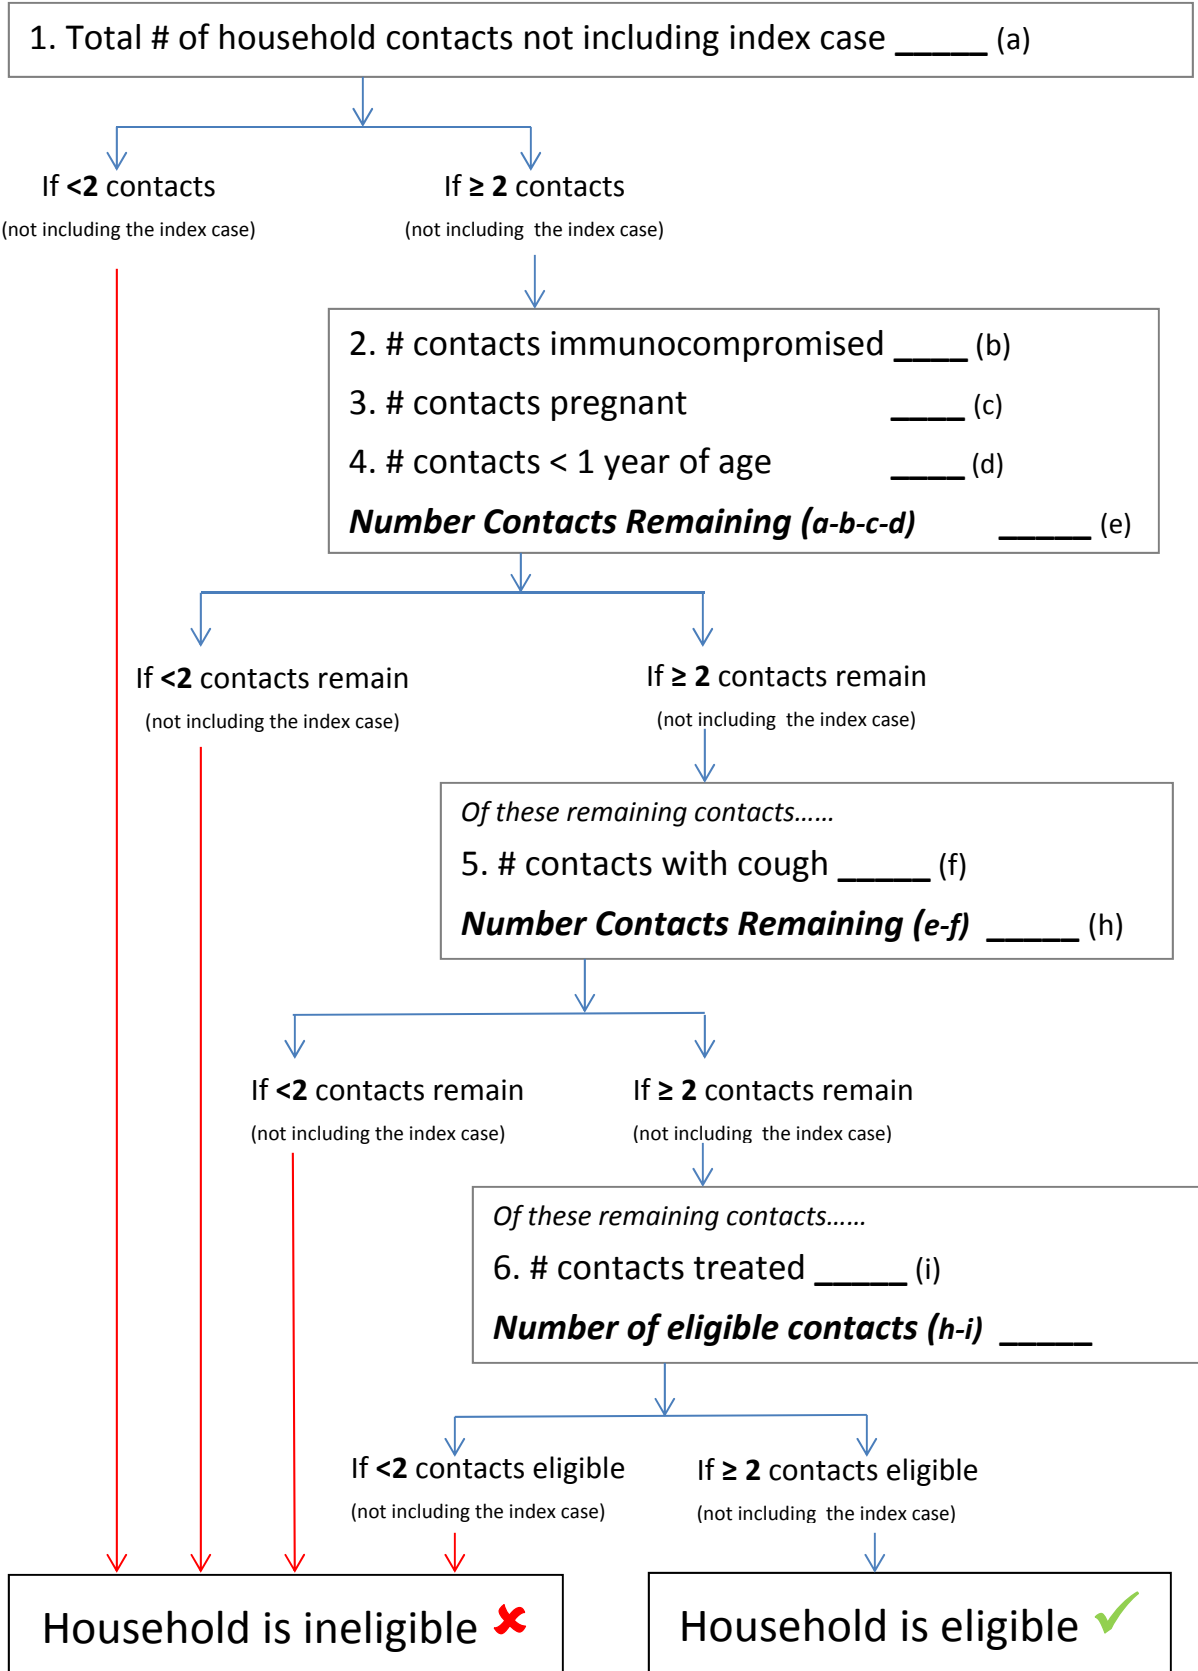

| Index case name:                                                                                                                                                                                                                                | Date of specimen collection: |
|-------------------------------------------------------------------------------------------------------------------------------------------------------------------------------------------------------------------------------------------------|------------------------------|
| Question                                                                                                                                                                                                                                        | Response (Counts)            |
| 1. Not including the index case, how many people are in your family (including yourself)?                                                                                                                                                       |                              |
| <b>NOTE:</b> Exclude household from study if there is only one person remaining in household apart from index case                                                                                                                              |                              |
| 2. Of the people mentioned, how many are immune-compromised?                                                                                                                                                                                    |                              |
| 3. Of the people mentioned, is anyone pregnant?                                                                                                                                                                                                 |                              |
| 4. Of the people mentioned, are there any infants under one year of age?                                                                                                                                                                        |                              |
| <b>NOTE:</b> Exclude household if there are <2 individuals left after removing the counts from 2, 3 and 4. Refer pregnant women to prophylaxis treatment if they have not received this yet.                                                    |                              |
| 5. Of the remaining contacts, how many have been sick with a cough within the two months before or after xxxxx (index case's name) became sick?                                                                                                 |                              |
| <b>NOTE:</b> Exclude household if there are <2 individuals left after removing the counts from 5. Exclude household if everyone has had a cough. This exclusion should also include the index case.                                             |                              |
| 6. Of the remaining contacts, how many have received medication for pertussis even if they were not sick?                                                                                                                                       |                              |
| <b>NOTE:</b> Exclude household if there are <2 individuals left after removing the counts from 6. Exclude household if everyone in the household has received medication (e.g., clarithromycin and erythromycin, trimethoprim-sulfamethoxazole) |                              |
| <b>Total Number of Eligible* Participants</b>                                                                                                                                                                                                   |                              |

\*Ineligible participants are those that are: reported index case, received prophylaxis treatment, pregnant, under one year of age, suspected co-primary cases/epi-linked cases, and are immuno-compromised.

If there is only one member of the household who is eligible for the study, this household is ineligible for the study.

→ Based on the responses to these questions, your household is [eligible/ineligible] for this study.

(If eligible) We would like to interview each of the eligible members of your family separately.

(If ineligible) Unfortunately, your family is not eligible for the study and we thank you for your time for considering this study. We hope your family gets well soon.

If household is eligible:

1. Obtain verbal consent for home visit
2. Ask that household members find their immunization records and have them handy to help them to answer questions during the home visit about when and what types of vaccines they've had.
